# Supplementary material for: Psychometric evaluation of the ‘Attitudes and Beliefs about Cardiovascular Disease (ABCD) Risk Questionnaire’ with validation of a previously untested ‘Intentions and Beliefs around Smoking’ subscale
Source: PubMed Central journal article supplement (PMC9843199; doi:10.1136/bmjopen-2021-054532), 2023-01-13
Supplement: bmjopen-2021-054532supp003.pdf [file bmjopen-2021-054532supp003.pdf]

**Appendix 3**

ABCD subscale and selected INTERHEART variable correlation values from Nottingham study compared with values reported in the original Woringer study.

|                           |                                    | Knowled<br>ge | Perceiv<br>ed Risk | Perceiv<br>ed Benefit | Healthy<br>Intentio<br>ns | IMD20<br>10<br>Quintil<br>e | BMI/W2<br>Hr    | Qrisk2/<br>INTERHEA<br>RT |
|---------------------------|------------------------------------|---------------|--------------------|-----------------------|---------------------------|-----------------------------|-----------------|---------------------------|
| Knowled<br>ge             | Correlati<br>on<br>Coefficie<br>nt |               | -.124/<br>.013     | -.148/<br>-.021       | -.106/<br>-.039           | -.002/<br>.085              | -.225/<br>-.084 | -.007/<br>-.018           |
|                           | Sig 2<br>tailed                    |               | .236/<br>.722      | .175/<br>.645         | .319/<br>.400             | .986/<br>.066               | .021/<br>.082   | .941/<br>.714             |
|                           | N                                  |               | 93/462             | 86/462                | 91/462                    | 99/466                      | 105/433         | 104/436                   |
| Perceive<br>d Risk        | Correlati<br>on<br>Coefficie<br>nt |               |                    | -.195/<br>-.112       | -.188/<br>-0.36           | .239/<br>.039               | .389/<br>.182   | .220/<br>.356             |
|                           | Sig 2<br>tailed                    |               |                    | .080/<br>.016         | .088/<br>.441             | .025/<br>.397               | .000/<br>.000   | .036/<br>.000             |
|                           | N                                  |               |                    | 82/462                | 84/462                    | 87/466                      | 92/433          | 91/436                    |
| Perceive<br>d Benefits    | Correlati<br>on<br>Coefficie<br>nt |               |                    |                       | .533/<br>.383             | -.287/<br>.071              | -.068/<br>.000  | -.118/<br>-.164           |
|                           | Sig 2<br>tailed                    |               |                    |                       | .000/<br>.000             | .009/<br>.127               | .538/<br>.997   | .284/<br>.001             |
|                           | N                                  |               |                    |                       | 83/462                    | 81/466                      | 85/433          | 84/436                    |
| Healthy<br>Intentio<br>ns | Correlati<br>on<br>Coefficie<br>nt |               |                    |                       |                           | -.261/<br>.098              | .084/<br>.044   | -.072/<br>-.079           |
|                           | Sig 2<br>tailed                    |               |                    |                       |                           | .016/<br>.034               | .430/<br>.365   | .504/<br>.100             |
|                           | N                                  |               |                    |                       |                           | 85/466                      | 90/462          | 89/436                    |

## Correlations

## Correlations

## Correlations

|                | knowledge score<br>total_score | Risk score                      | Benefit score | Diet score |         |        |         |
|----------------|--------------------------------|---------------------------------|---------------|------------|---------|--------|---------|
| Spearman's rho | knowledge score<br>.079        | Correlation Coefficient<br>.079 | 1.000         | .118**     | .103*   | .078   | -       |
|                | Sig. (2-tailed)                | .009                            | .023          | .086       | .082    | .896   |         |
|                | N                              | 483                             | 483           | 483        | 483     | 440    |         |
| Risk score     | Correlation Coefficient        | .118**                          | 1.000         | -.003      | .057    | .107*  | .371**  |
|                | Sig. (2-tailed)                | .009                            | .950          | .212       | .019    | .000   |         |
|                | N                              | 483                             | 483           | 483        | 483     | 440    |         |
| Benefit score  | Correlation Coefficient        | .103*                           | -.003         | 1.000      | .538**  | .009   | -.236** |
|                | Sig. (2-tailed)                | .023                            | .950          | .000       | .851    | .000   |         |
|                | N                              | 483                             | 483           | 483        | 483     | 440    |         |
| Diet score     | Correlation Coefficient        | .078                            | .057          | .538**     | 1.000   | -.022  | -.143** |
|                | Sig. (2-tailed)                | .086                            | .212          | .000       | .635    | .003   |         |
|                | N                              | 483                             | 483           | 483        | 483     | 440    |         |
| Smoke score    | Correlation Coefficient        | -.079                           | .107*         | .009       | -.022   | 1.000  | .240**  |
|                | Sig. (2-tailed)                | .082                            | .019          | .851       | .635    | .000   |         |
|                | N                              | 483                             | 483           | 483        | 483     | 440    |         |
| total_score    | Correlation Coefficient        | .006                            | .371**        | -.236**    | -.143** | .240** | 1.000   |
|                | Sig. (2-tailed)                | .896                            | .000          | .000       | .003    | .000   |         |
|                | N                              | 440                             | 440           | 440        | 440     | 440    |         |

\*\* Correlation is significant at the 0.01 level (2-tailed).

\* Correlation is significant at the 0.05 level (2-tailed).
