# Supplementary material for: Psychometric evaluation of the ‘Attitudes and Beliefs about Cardiovascular Disease (ABCD) Risk Questionnaire’ with validation of a previously untested ‘Intentions and Beliefs around Smoking’ subscale
Source: PubMed Central journal article supplement (PMC9843199; doi:10.1136/bmjopen-2021-054532), 2023-01-13
Supplement: bmjopen-2021-054532supp005.pdf [file bmjopen-2021-054532supp005.pdf]

## Appendix 5.

### Item Analysis of published ABCD Risk Questionnaire sub-scales plus 5 unpublished items relating to smoking compared to Item Analysis of recommended edited ABCD Risk Questionnaire sub-scales plus 5 unpublished items relating to smoking.

Table 1. Item Analysis of published ABCD Risk Questionnaire sub-scales plus 5 unpublished items relating to smoking

| Perceived Risk of Heart Attack/<br>Stroke<br>8 Items<br>Cronbach's Alpha .861<br>(0.84,0.88) 95% CI | Inter-item<br>correlation | Corrected Item-<br>total correlation | Cronbach's alpha if item<br>deleted |
|-----------------------------------------------------------------------------------------------------|---------------------------|--------------------------------------|-------------------------------------|
| It is likely that I will suffer from a heart attack or stroke in the future                         | <b>.832</b>               | .756                                 | .826                                |
| It is likely that I will have a heart attack or stroke some time during my life                     | <b>.869</b>               | .777                                 | .824                                |
| I feel I will suffer a heart attack or stroke some time during my life                              | <b>.616</b>               | .784                                 | .824                                |
| There is a good chance I will experience a heart attack or stroke in the next 10 years              | <b>.729</b>               | .722                                 | .832                                |
| I am not worried that I might have a heart attack or stroke                                         | .403                      | .624                                 | .843                                |
| My chances of suffering a heart attack or stroke in the next 10 years are great                     | .245                      | .544                                 | .852                                |
| It is likely that I will have a heart attack or stroke because of my past/present behaviours        | .266                      | .319                                 | <b>.876</b>                         |
| I am concerned about the likelihood of having a heart attack or stroke in the near future           | .259                      | .387                                 | <b>.870</b>                         |
| Perceived Benefits and<br>Intentions to Change<br>7 items<br>Cronbach's Alpha .801                  | Inter-item<br>correlation | Corrected Item-<br>total correlation | Cronbach's alpha if item<br>deleted |
| I am thinking about exercising at least 2.5 hours a week                                            | <b>.727</b>               | <b>.605</b>                          | .760                                |
| I intend or want to exercise at least 2.5 hours a week                                              | .442                      | <b>.651</b>                          | .752                                |
| When I exercise for at least 2.5 hours a week I am doing something good for the health of my heart  | .426                      | .593                                 | .769                                |
| I am confident that I can maintain a healthy weight by exercising at                                | .294                      | .452                                 | .790                                |

|                                                                                                                   |                               |                                         |                                         |
|-------------------------------------------------------------------------------------------------------------------|-------------------------------|-----------------------------------------|-----------------------------------------|
| least 2.5 hours a week within the next 2 months                                                                   |                               |                                         |                                         |
| I am not thinking about exercising at least 2.5 hours a week                                                      | .264                          | .508                                    | .781                                    |
| When I eat at least 5 portions of fruit and vegetables a day I am doing something good for the health of my heart | .483                          | .483                                    | .783                                    |
| Increasing my exercise to at least 2.5 hours a week will decrease my chances of having a heart attack or stroke   | .326                          | .474                                    | .786                                    |
| <b>Healthy Eating Intentions<br/>3 items<br/>Cronbach's Alpha .787 (95% CI</b>                                    | <b>Inter-item correlation</b> | <b>Corrected Item-total correlation</b> | <b>Cronbach's alpha if item deleted</b> |
| I am confident that I can eat at least 5 portions of fruit and vegetables a day within the next 2 months          | .555                          | .533                                    | <b>.812</b>                             |
| I am thinking about eating at least 5 portions of fruit and vegetables a day                                      | <b>.683</b>                   | <b>.732</b>                             | .596                                    |
| I am not thinking about eating at least 5 portions of fruit and vegetables a day                                  | .424                          | <b>.624</b>                             | .713                                    |
| <b>Perceived Benefits and Intentions to Stop Smoking<br/>5 Items<br/>Cronbach's Alpha .943 95% CI</b>             | <b>Inter-item correlation</b> | <b>Corrected item-total correlation</b> | <b>Cronbach's alpha if item deleted</b> |
| I am thinking of stopping smoking within the next 2 months                                                        | <b>.654</b>                   | .848                                    | .932                                    |
| I have reduced or stopped smoking                                                                                 | <b>.694</b>                   | .751                                    | <b>.949</b>                             |
| I intend or want to stop smoking                                                                                  | <b>.829</b>                   | .906                                    | .919                                    |
| If I stop smoking it will reduce my chances of having a heart attack or stroke                                    | <b>.834</b>                   | .886                                    | .922                                    |
| I am not thinking about stopping smoking                                                                          | <b>.789</b>                   | .872                                    | .925                                    |

Table 2. Item Analysis of edited ABCD Risk Questionnaire sub-scales plus 5 unpublished items relating to smoking.

| <b>Perceived Risk of Heart Attack/<br/>Stroke<br/>5 Items<br/>Cronbach's Alpha .86 (0.84,0.88)<br/>95% CI<br/>Omega 0.85 (0.83, 0.88) 95% CI</b>    | <b>Inter-item<br/>correlation</b> | <b>Corrected Item-<br/>total correlation</b> | <b>Cronbach's alpha if item<br/>deleted</b> |
|-----------------------------------------------------------------------------------------------------------------------------------------------------|-----------------------------------|----------------------------------------------|---------------------------------------------|
| It is likely that I will have a heart attack or stroke some time during my life                                                                     | <b>.869</b>                       | .777                                         | .824                                        |
| There is a good chance I will experience a heart attack or stroke in the next 10 years                                                              | <b>.729</b>                       | .722                                         | .832                                        |
| I am not worried that I might have a heart attack or stroke                                                                                         | .403                              | .624                                         | .843                                        |
| It is likely that I will have a heart attack or stroke because of my past/present behaviours                                                        | .266                              | .319                                         | <b>.876</b>                                 |
| I am concerned about the likelihood of having a heart attack or stroke in the near future                                                           | .259                              | .387                                         | <b>.870</b>                                 |
| <b>Perceived Benefits and<br/>Intentions to Change<br/>6 items<br/>Cronbach's Alpha .84 (.81-.86)<br/>95% CI<br/>Omega 0.82 (0.78, 0.85) 95% CI</b> | <b>Inter-item<br/>correlation</b> | <b>Corrected Item-<br/>total correlation</b> | <b>Cronbach's alpha if item<br/>deleted</b> |
| I am thinking about exercising at least 2.5 hours a week                                                                                            | <b>.727</b>                       | <b>.605</b>                                  | .760                                        |
| I intend or want to exercise at least 2.5 hours a week                                                                                              | .442                              | <b>.651</b>                                  | .752                                        |
| When I exercise for at least 2.5 hours a week I am doing something good for the health of my heart                                                  | .426                              | .593                                         | .769                                        |
| I am confident that I can maintain a healthy weight by exercising at least 2.5 hours a week within the next 2 months                                | .294                              | .452                                         | .790                                        |
| I am not thinking about exercising at least 2.5 hours a week                                                                                        | .264                              | .508                                         | .781                                        |
| Increasing my exercise to at least 2.5 hours a week will decrease my chances of having a heart attack or stroke                                     | .326                              | .474                                         | .786                                        |
| <b>Healthy Eating Intentions<br/>4 items</b>                                                                                                        | <b>Inter-item<br/>correlation</b> | <b>Corrected Item-<br/>total correlation</b> | <b>Cronbach's alpha if item<br/>deleted</b> |

|                                                                                                                        |                               |                                         |                                         |
|------------------------------------------------------------------------------------------------------------------------|-------------------------------|-----------------------------------------|-----------------------------------------|
| <b>Cronbach's Alpha .84 (.81-.86)<br/>95% CI<br/>Omega 0.84 (0.81, 0.88) 95% CI</b>                                    |                               |                                         |                                         |
| I am confident that I can eat at least 5 portions of fruit and vegetables a day within the next 2 months               | .555                          | .533                                    | <b>.812</b>                             |
| I am thinking about eating at least 5 portions of fruit and vegetables a day                                           | <b>.683</b>                   | <b>.732</b>                             | .596                                    |
| I am not thinking about eating at least 5 portions of fruit and vegetables a day                                       | .424                          | <b>.624</b>                             | .713                                    |
| When I eat at least 5 portions of fruit and vegetables a day I am doing something good for the health of my heart      | .483                          | .483                                    | .783                                    |
| <b>Smoking Intentions<br/>5 items<br/>Cronbach's Alpha .85 (.83-.87)<br/>95% CI<br/>Omega 0.84 (0.81, 0.91) 95% CI</b> | <b>Inter-item correlation</b> | <b>Corrected Item-total correlation</b> | <b>Cronbach's alpha if item deleted</b> |
| I am thinking of stopping smoking within the next 2 months                                                             | <b>.654</b>                   | .848                                    | .932                                    |
| I have reduced or stopped smoking                                                                                      | <b>.694</b>                   | .751                                    | <b>.949</b>                             |
| I intend or want to stop smoking                                                                                       | <b>.829</b>                   | .906                                    | .919                                    |
| If I stop smoking it will reduce my chances of having a heart attack or stroke                                         | <b>.834</b>                   | .886                                    | .922                                    |
| I am not thinking about stopping smoking                                                                               | <b>.789</b>                   | .872                                    | .925                                    |
