# Supplementary material for: Psychometric evaluation of the ‘Attitudes and Beliefs about Cardiovascular Disease (ABCD) Risk Questionnaire’ with validation of a previously untested ‘Intentions and Beliefs around Smoking’ subscale
Source: PubMed Central journal article supplement (PMC9843199; doi:10.1136/bmjopen-2021-054532), 2023-01-13
Supplement: bmjopen-2021-054532supp007.pdf [file bmjopen-2021-054532supp007.pdf]

## Appendix 7. Modified ABCD Risk Questionnaire

Mark Bowyer, Hamid Hassen

| Scale                                                | Items                                                                                                               | Coding                                                                                         |
|------------------------------------------------------|---------------------------------------------------------------------------------------------------------------------|------------------------------------------------------------------------------------------------|
| <b>Perceived Risk of Heart Attack or Stroke</b>      | 1. It is likely that I will have a heart attack or stroke sometime in my life                                       | 4= Strongly disagree, 3= Disagree, 2= Agree, 1= Strongly Agree; N/A= 0                         |
|                                                      | 2. There is a good chance I will experience a heart attack or stroke in the next 10 years                           | 4= Strongly disagree, 3= Disagree, 2= Agree, 1= Strongly Agree; N/A= 0                         |
|                                                      | 3. It is (more) likely I will have a heart attack or stroke because of my past and/or present behaviours            | 4= Strongly disagree, 3= Disagree, 2= Agree, 1= Strongly Agree; N/A= 0                         |
|                                                      | 4. I am not worried that I might have a heart attack or stroke                                                      | <b>REVERSE CODED</b><br>4= Strongly disagree, 3= Disagree, 2= Agree, 1= Strongly Agree; N/A= 0 |
|                                                      | 5. I am concerned about the likelihood of having a heart attack or stroke in the near future                        | 4= Strongly disagree, 3= Disagree, 2= Agree, 1= Strongly Agree; N/A= 0                         |
| <b>Perceived Benefits and Intentions to Exercise</b> | 6. I am thinking about exercising at least 2.5 hours a week                                                         | 4= Strongly disagree, 3= Disagree, 2= Agree, 1= Strongly Agree; N/A= 0                         |
|                                                      | 7. I intend or want to exercise at least 2.5 hours a week                                                           | 4= Strongly disagree, 3= Disagree, 2= Agree, 1= Strongly Agree; N/A= 0                         |
|                                                      | 8. When I exercise for at least 2.5 hours a week I am doing something good for the health of my heart               | 4= Strongly disagree, 3= Disagree, 2= Agree, 1= Strongly Agree; N/A= 0                         |
|                                                      | 9. I am confident that I can maintain a healthy weight by exercising at least 2.5 hours a week                      | 4= Strongly disagree, 3= Disagree, 2= Agree, 1= Strongly Agree; N/A= 0                         |
|                                                      | 10. I am not thinking about exercising for 2.5 hours a week                                                         | <b>REVERSE CODED</b><br>4= Strongly disagree, 3= Disagree, 2= Agree, 1= Strongly Agree; N/A= 0 |
|                                                      | 11. Increasing my exercise to at least 2.5 hours a week will decrease my chances of having a heart attack or stroke | 4= Strongly disagree, 3= Disagree, 2= Agree, 1= Strongly Agree; N/A= 0                         |

|                                                        |                                                                                                                   |                                                                                                |
|--------------------------------------------------------|-------------------------------------------------------------------------------------------------------------------|------------------------------------------------------------------------------------------------|
| <b>Perceived Benefit and Healthy Eating Intentions</b> | 12. I am confident that I can eat at least five portions of fruit and vegetables a day within the next two months | 4= Strongly disagree, 3= Disagree, 2= Agree, 1= Strongly Agree; N/A= 0                         |
|                                                        | 13. I am thinking about eating at least five portions of fruit and vegetables a day                               | 4= Strongly disagree, 3= Disagree, 2= Agree, 1= Strongly Agree; N/A= 0                         |
|                                                        | 14. I am not thinking about eating at least five portions of fruit and vegetables a day                           | <b>REVERSE CODED</b><br>4= Strongly disagree, 3= Disagree, 2= Agree, 1= Strongly Agree; N/A= 0 |
|                                                        | 15. When I eat five portions of fruit and vegetables a day I am doing something good for the health of my heart   | 4= Strongly disagree, 3= Disagree, 2= Agree, 1= Strongly Agree; N/A= 0                         |
| <b>Benefits and Intentions to Stop Smoking</b>         | 16. I am thinking of stopping smoking within two months                                                           | 4= Strongly disagree, 3= Disagree, 2= Agree, 1= Strongly Agree; N/A= 0                         |
|                                                        | 17. I have reduced or stopped smoking                                                                             | 4= Strongly disagree, 3= Disagree, 2= Agree, 1= Strongly Agree; N/A= 0                         |
|                                                        | 18. I intend or want to stop smoking                                                                              | 4= Strongly disagree, 3= Disagree, 2= Agree, 1= Strongly Agree; N/A= 0                         |
|                                                        | 19. If I stop smoking it will reduce my chances of having a heart attack or stroke                                | 4= Strongly disagree, 3= Disagree, 2= Agree, 1= Strongly Agree; N/A= 0                         |
|                                                        | 20. I am not thinking about stopping smoking                                                                      | <b>REVERSE CODED</b><br>4= Strongly disagree, 3= Disagree, 2= Agree, 1= Strongly Agree; N/A= 0 |
