# Supplementary material for: Psychometric evaluation of the ‘Attitudes and Beliefs about Cardiovascular Disease (ABCD) Risk Questionnaire’ with validation of a previously untested ‘Intentions and Beliefs around Smoking’ subscale
Source: BMJ Open. 2023 Jan 13;13(1):e054532. doi: 10.1136/bmjopen-2021-054532 (PMC9843199; doi:10.1136/bmjopen-2021-054532)
Supplement: Supplementary data [file bmjopen-2021-054532supp006.pdf]

Appendix 6. Characteristics of the sample population

| Population Characteristics |                      | N   | % total |
|----------------------------|----------------------|-----|---------|
| Gender                     | Male                 | 218 | 49.8    |
|                            | Female               | 220 | 50.2    |
| Age Group                  | 18-30                | 78  | 17.8    |
|                            | 30-39                | 80  | 18.3    |
|                            | 40-49                | 82  | 18.7    |
|                            | 50-59                | 99  | 22.6    |
|                            | 60-74                | 78  | 17.8    |
|                            | 74+                  | 53  | 12.1    |
| Deprivation                | IMD1- least deprived | 84  | 17.98   |
|                            | IMD2                 | 55  | 11.77   |
|                            | IMD3                 | 83  | 17.77   |
|                            | IMD4                 | 89  | 19.05   |
|                            | IMD5- most deprived  | 156 | 33.4    |
|                            |                      |     |         |
|                            |                      |     |         |
|                            |                      |     |         |
|                            |                      |     |         |
|                            |                      |     |         |
|                            |                      |     |         |
|                            |                      |     |         |
|                            |                      |     |         |
|                            |                      |     |         |
